# Supplementary material
Source: Springer Nature journal article supplement (https://www.springermedizin.de/resource/supplementary/12891_2014_2158_MOESM1_ESM.pdf/9509546)

**Percentage of Patients Who Meet CDC/WHO  
Aerobic PA Guidelines**

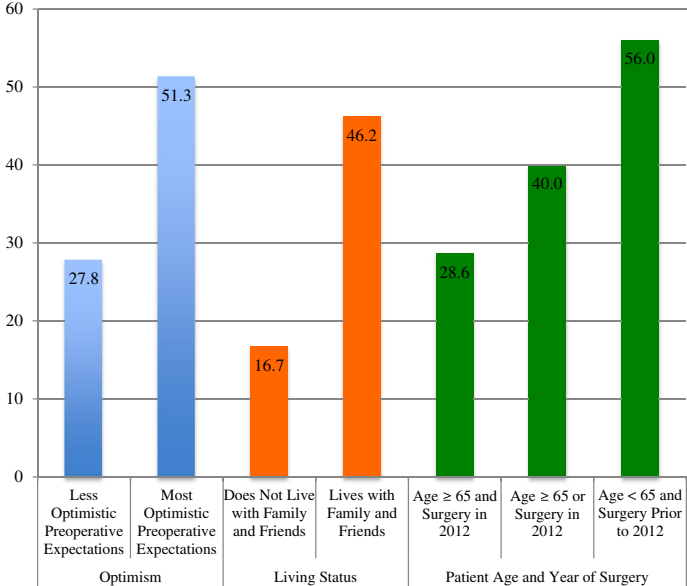

Supplement: MOESM1 [file 9509546]
